# Supplementary material for: Chemical identification of cannabinoids in street marijuana samples using electrospray ionization FT-ICR mass spectrometry
Source: Royal Society of Chemistry journal article supplement (doi:10.1039/c4ay02355b), 2015-01-01

Supplementary Material

Table 1S. Proposed structures of cannabinoids and their respective molecular weight.

| Molecular weight | Proposed structures                                                                                                                                                                                                                                                                                                                                                                                                                                                              |
|------------------|----------------------------------------------------------------------------------------------------------------------------------------------------------------------------------------------------------------------------------------------------------------------------------------------------------------------------------------------------------------------------------------------------------------------------------------------------------------------------------|
| 258              | <div style="display: flex; justify-content: space-around; align-items: center;"><div style="text-align: center;">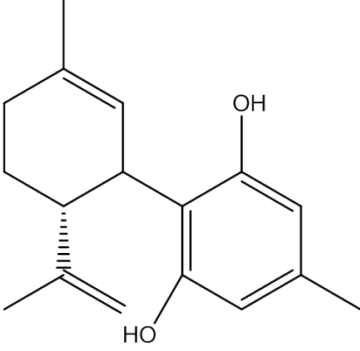<p><b>Cannabidiolcol</b><br/><b>CBD-C<sub>1</sub></b></p></div><div style="text-align: center;"><p><b>Tetrahydrocannabiorcol</b><br/><b>Δ<sup>9</sup>-THCO-C<sub>1</sub></b></p></div></div> |
| 282              | <div style="display: flex; justify-content: space-around; align-items: center;"><div style="text-align: center;"><p><b>Cannabinodivarin</b><br/><b>CBVD-C<sub>3</sub></b></p></div><div style="text-align: center;"><p><b>Cannabivarin</b><br/><b>CBN-C<sub>3</sub></b></p></div></div>                     |

286

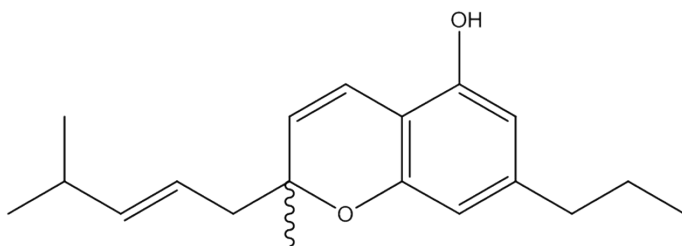

**2-Methyl-2-(4-methyl-2-pentenyl)-7-propyl-2H-1-benzopyran-5-ol**

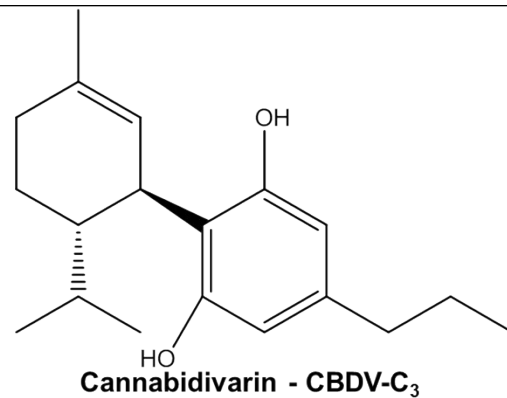

**Cannabidivarin - CBDV-C<sub>3</sub>**

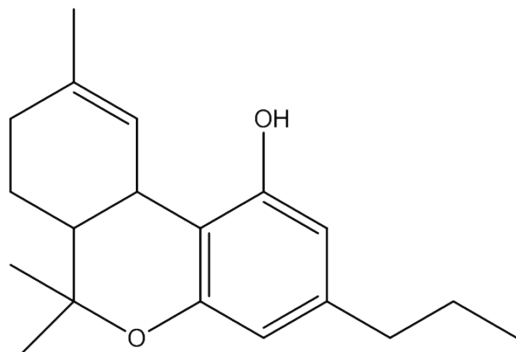

**Tetrahydrocannabivarin THCv-C<sub>3</sub>**

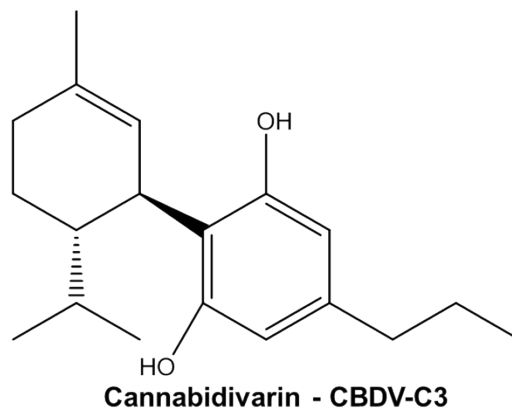

**Cannabidivarin - CBDV-C<sub>3</sub>**

296

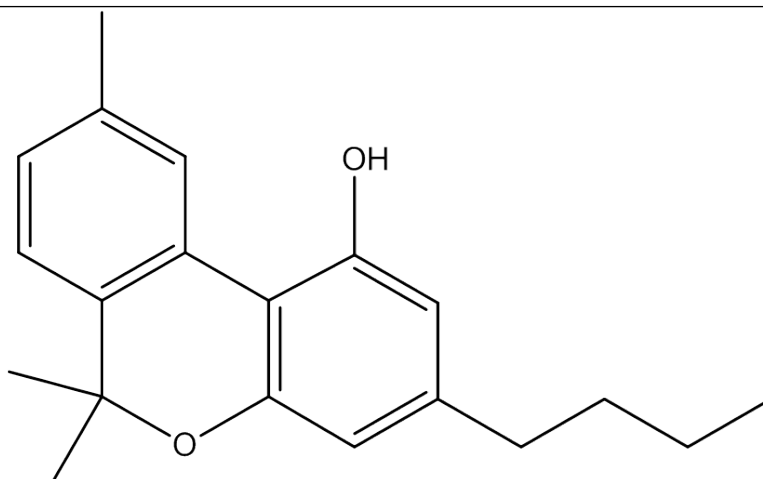

**Cannabinol- CBN-C<sub>4</sub>**

302

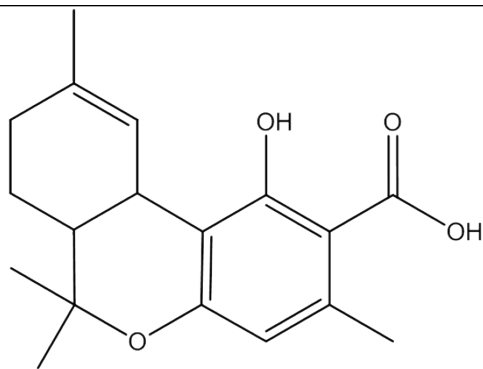

**Tetrahydrocannabiorcolic  
THCOA-C1**

304

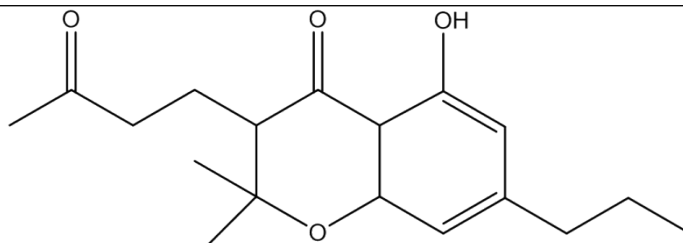

**Cannabichromanone- C3  
CBCN-C3**

308

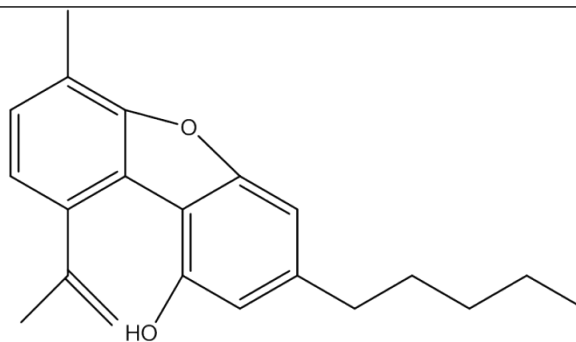

**Dehydrocannabifuran  
(DCBF-C5)**

310

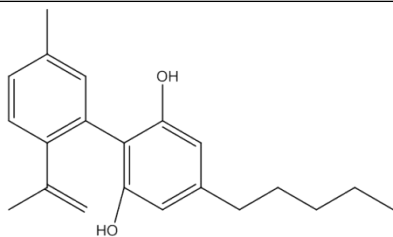

**Cannabinodiol CBND-C5**

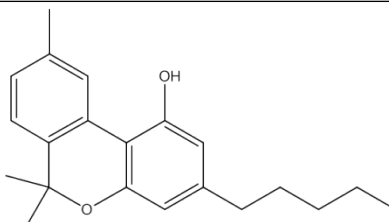

**Cannabinol - CBN-C5**

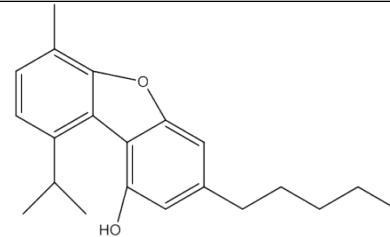

**Cannabifuran - CBF**

314

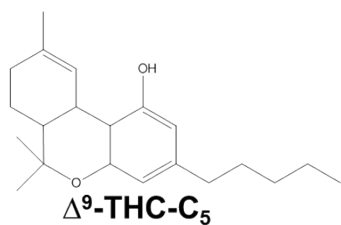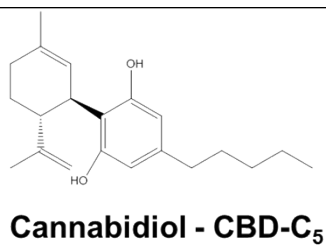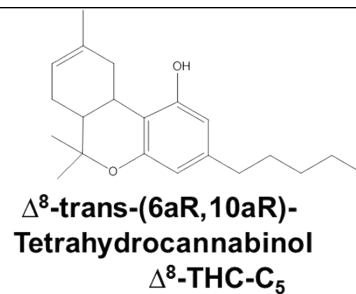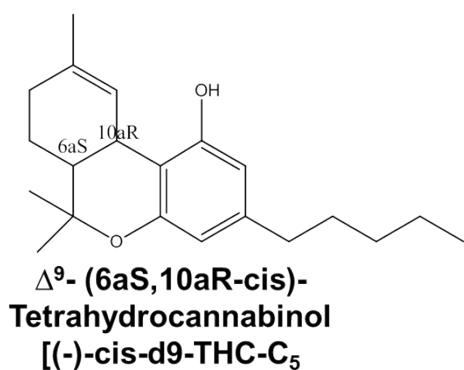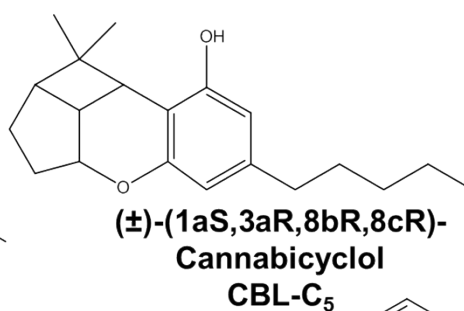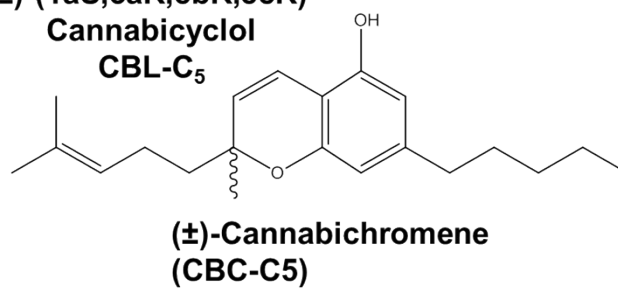

328

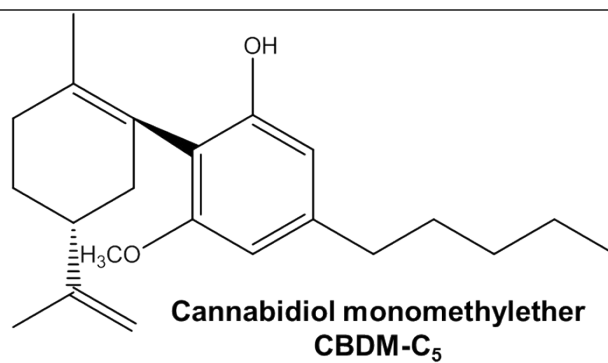

330

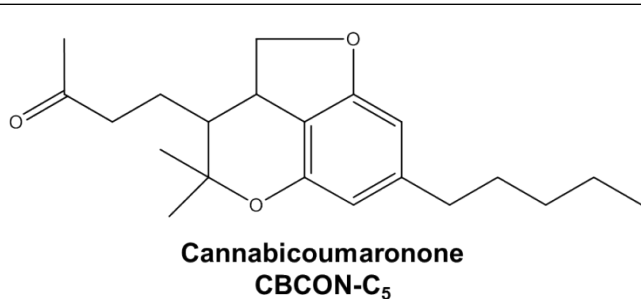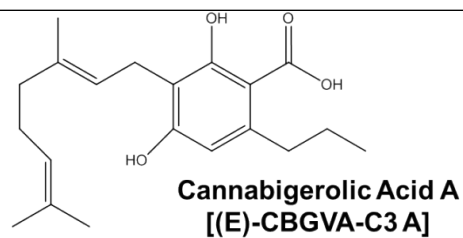

330

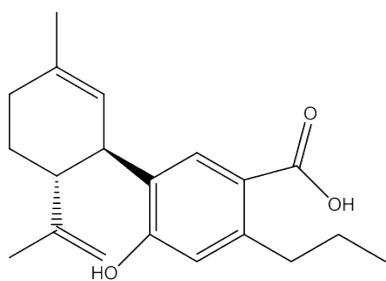

**Cannabidivarinic acid  
(CBDVA-C<sub>3</sub>)**

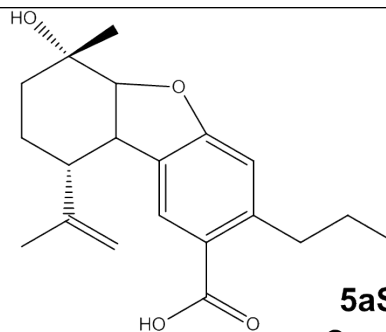

**5aS, 6S, 9R, 9aR -  
Cannabielsoic acid B  
CBEA-C<sub>3</sub>B**

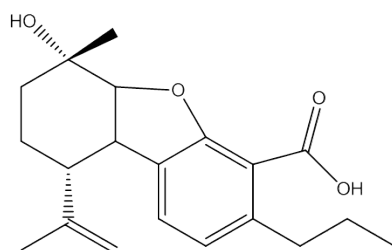

**5aS, 6S, 9R, 9aR - Cannabielsoic acid A  
CBEA-C<sub>3</sub>A**

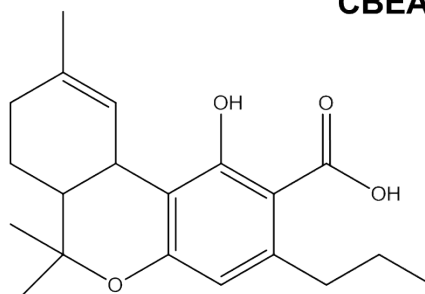

**Tetrahydrocannabivarin THCVA-C<sub>3</sub>**

332

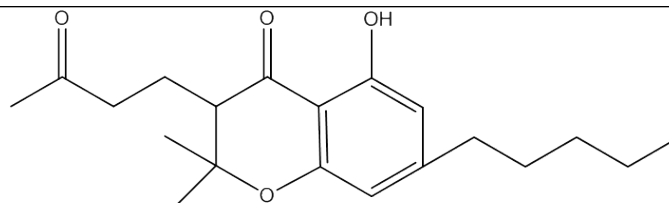

**Cannabichromanone  
CBCN-C<sub>5</sub>**

344

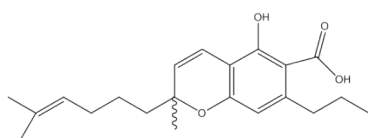

**(±)Cannabichromevarinic Acid  
CBCVA-C<sub>3</sub> A**

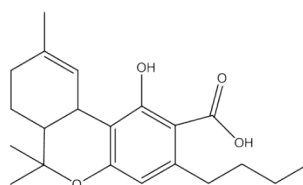

**Tetrahydrocannabinolic acid - C<sub>4</sub>  
THCA-C<sub>4</sub> A**

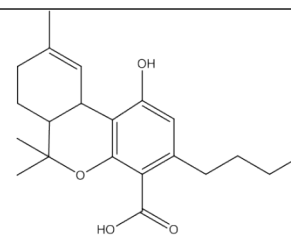

**Tetrahydrocannabinolic acid - C<sub>4</sub>  
THCA-C<sub>4</sub> B**

346

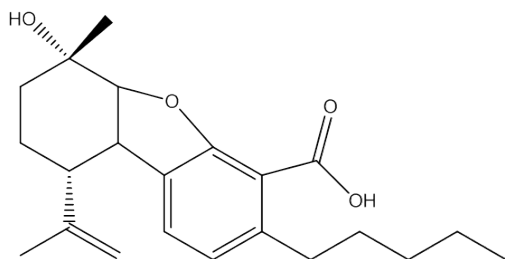

**Cannabielsoic acid A**  
**CBEA-C<sub>5</sub> A**

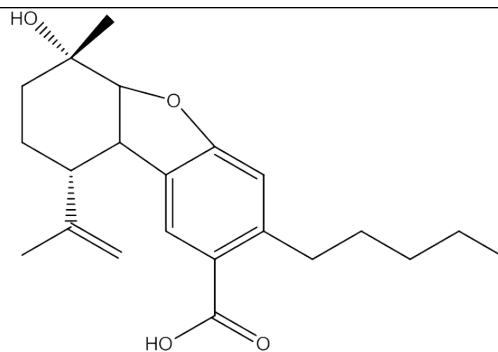

**Cannabielsoic acid B**  
**CBEA-C<sub>5</sub> B**

354

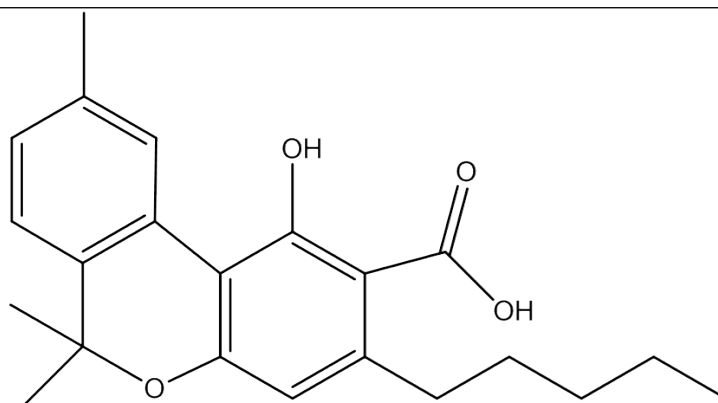

**Cannabinolic acid A (CBNA-C<sub>5</sub> A)**

358

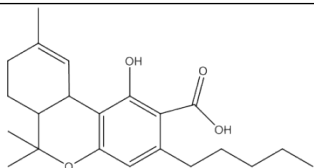

**Tetrahydrocannabinolic acid A**  
**THCA-C<sub>5</sub> A**

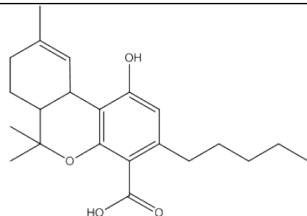

**Tetrahydrocannabinolic acid B**  
**THCA-C<sub>5</sub> B**

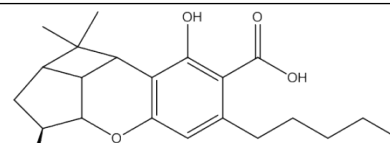

**Cannabicyclic acid**  
**CBLA-C<sub>5</sub> A**

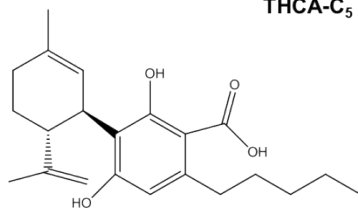

**Cannabidiolic acid**  
**CBDA-C<sub>5</sub>**

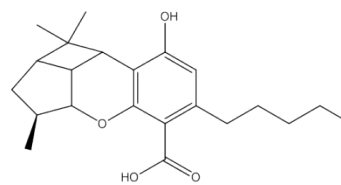

**Cannabicyclic acid**  
**CBLA-C<sub>5</sub> B**

362

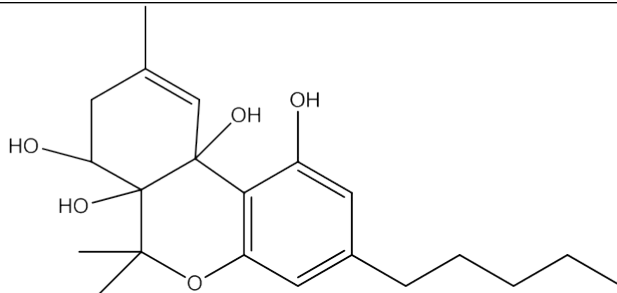

Supplement: c4ay02355b1.pdf [file c4ay02355b1.pdf]
